# Supplementary material for: The magnetism of 1T-MX2 (M = Zr, Hf; X = S, Se) monolayers by hole doping
Source: Royal Society of Chemistry journal article supplement (doi:10.1039/c9ra01218d), 2019-01-01
Supplement: c9ra01218d1.pdf [file c9ra01218d1.pdf]

Supplementary Information

## The Magnetism of 1T-MX<sub>2</sub> (M = Zr, Hf; X = S, Se) Monolayers by Hole Doping

Hui xiang,<sup>\*abc</sup> Bo Xu,<sup>d</sup> Weiqian Zhao,<sup>a</sup> Yidong Xia,<sup>b</sup> Jiang Yin,<sup>b</sup> Xiaofei Zhang<sup>a</sup> and Zhiguo Liu<sup>\*b</sup>

<sup>a</sup> School of Mathematics and Physics, Hubei Polytechnic University, Huangshi, 435003, China

<sup>b</sup> National Laboratory of Solid State Microstructures and Department of Materials Science and Engineering, Nanjing University, Nanjing, 210093, China

<sup>c</sup> School of Chemistry and Chemical Engineering, Wuhan University of Science and Technology, Wuhan, 430081, China

<sup>d</sup> School of Sciences, Key Laboratory of Biomedical Functional Materials, China Pharmaceutical University, Nanjing, 211198, China

Electronic mail: [hxiang0717@163.com](mailto:hxiang0717@163.com), and [liuzg@nju.edu.cn](mailto:liuzg@nju.edu.cn).

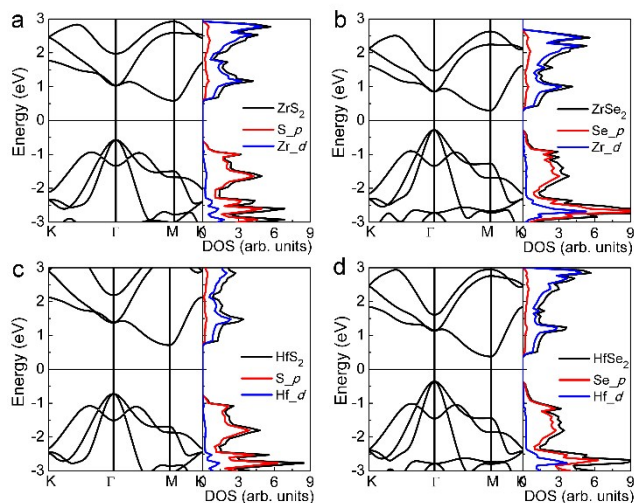

Fig. S1 The band structures and DOS of MX<sub>2</sub> (M=Zr, Hf; X=S, Se) monolayers. The red and blue lines in the right image represent the contribution of the *p* orbital of the S (Se) atoms and the *d* orbital of the Zr (Hf) atoms, respectively.
